# Supplementary material for: Weak Pb–O of confined [Pb–O4] in pyramidal sillenite-type Bi12PbO20 for enhanced electrochemical ozone production
Source: Royal Society of Chemistry journal article supplement (doi:10.1039/d1ta10701a), 2022-01-01
Supplement: d1ta10701a1.pdf [file d1ta10701a1.pdf]

## Electronic Supplementary Information (ESI)

### Weak Pb–O of Confined [Pb–O<sub>4</sub>] in Pyramidal Sillenite-type Bi<sub>12</sub>PbO<sub>20</sub> for Enhanced Electrochemical Ozone Production

*Huaijie Shi<sup>a,#</sup>, Ge Feng<sup>a,#</sup>, Suiqin Li<sup>a</sup>, Jia Liu<sup>a</sup>, Xinying Yang<sup>a</sup>, Ye Li<sup>b</sup>, Ye Lu<sup>b</sup>, Xing Zhong<sup>a,\*</sup>, Shibin Wang<sup>a,\*</sup>, Jianguo Wang<sup>a,\*</sup>*

<sup>a</sup> Institute of Industrial Catalysis, College of Chemical Engineering, State Key Laboratory Breeding Base of Green-Chemical Synthesis Technology, Zhejiang University of Technology, Hangzhou, China.

<sup>b</sup> Department of Environmental Health, Zhejiang Provincial Center for Disease Control and Prevention, Hangzhou, China.

# H. J. Shi and G. Feng contribute to this work equally

\* Correspondence and requests for materials should be addressed to X. Z. (email: zhongx@zjut.edu.cn), or to S. B. W. (email: wangshibin@zjut.edu.cn), J. G. W. (email: jgw@zjut.edu.cn).

# Contents

- Fig. S1.** SEM image of  $\text{Bi}_2\text{O}_3$  flower. (Page S4)
- Fig. S2.** SEM images of  $\text{Bi}_{12}\text{PbO}_{20}$  at different reaction time. (Page S5)
- Fig. S3.** SEM image of  $\text{Bi}_{12}\text{PbO}_{20}$ -no NaOH. (Page S6)
- Fig. S4.** SEM image of  $\text{Bi}_{12}\text{PbO}_{20}$ -no PVP. (Page S7)
- Fig. S5.** SEM images of  $\text{Bi}_{12}\text{PbO}_{20}$ -1, 2, 4 and 5. (Page S8)
- Table S1.** Element contents of  $\text{Bi}_{12}\text{PbO}_{20}$ -1, 2, 3, 4 and 5 by ICP for Bi, Pb and XPS analysis for O content (mol. %). (Page S9)
- Fig. S6.** The FFT pattern of  $\text{Bi}_{12}\text{PbO}_{20}$ -3 by STEM. (Page S10)
- Fig. S7.** XRD pattern of  $\text{Bi}_{12}\text{PbO}_{20}$ -1, 2, 3, 4, 5 and  $\text{Bi}_2\text{O}_3$ . (Page S11)
- Fig. S8.**  $\text{N}_2$  adsorption-desorption isotherms of  $\text{Bi}_{12}\text{PbO}_{20}$ -1, 2, 3, 4, 5 and  $\text{Bi}_2\text{O}_3$ . (Page S12)
- Fig. S9.** The pore size distribution of  $\text{Bi}_{12}\text{PbO}_{20}$ -1, 2, 3, 4, 5 and  $\text{Bi}_2\text{O}_3$ . (Page S13)
- Table S2.** Surface area and pore volume of  $\text{Bi}_{12}\text{PbO}_{20}$ -1, 2, 3, 4, 5 and  $\text{Bi}_2\text{O}_3$ . (Page S14)
- Fig. S10.** Electron paramagnetic resonance test of  $\beta\text{-PbO}_2$ . (Page S15)
- Fig. S11.** XPS survey spectra of  $\text{Bi}_2\text{O}_3$ ,  $\text{Bi}_{12}\text{PbO}_{20}$ -1, 2, 3, 4, 5 and  $\beta\text{-PbO}_2$ . (Page S16)
- Fig. S12.** High-resolution XPS spectra of Pb 4f for  $\text{Bi}_{12}\text{PbO}_{20}$ -1, 2, 3, 4, 5 and  $\beta\text{-PbO}_2$ . (Page S17)
- Fig. S13.** High-resolution XPS spectra of Bi 4f for  $\text{Bi}_2\text{O}_3$ ,  $\text{Bi}_{12}\text{PbO}_{20}$ -1, 2, 3, 4 and 5. (Page S18)
- Fig. S14.** High-resolution XPS spectra of O 1s for  $\text{Bi}_2\text{O}_3$ ,  $\text{Bi}_{12}\text{PbO}_{20}$ -1, 2, 3, 4, 5 and  $\beta\text{-PbO}_2$ . (Page S19)
- Table S3.** Summary of functional groups for  $\text{Bi}_{12}\text{PbO}_{20}$ -3 obtained from XPS analysis. (Page S20)
- Fig. S15.** Steady state polarization curves of  $\text{Bi}_{12}\text{PbO}_{20}$ -n (n = 1, 2, 3, 4, 5),  $\beta\text{-PbO}_2$ , and  $\text{Bi}_2\text{O}_3$  after 2.12 V vs.RHE. (Page S21)
- Fig. S16.** Steady-state polarization curves for  $\text{Bi}_{12}\text{PbO}_{20}$ -3,  $\text{Bi}_{12}\text{PbO}_{20}$ -no NaOH and no PVP. (Page S22)
- Table S4.** Summary of the Electrochemical Properties of prepared Electrode. (Page S23)
- Fig. S17.** Qualitative concentration test of ozone water, the color depth represents the concentration of ozone. Give a qualitative comparison on the concentration of dissolved ozone. (Page S24)
- Table S5.** The anode voltage corresponding to different cell voltage. (Page S25)
- Fig. S18.** The standard curve of ozonated water concentration in saturated  $\text{K}_2\text{SO}_4$  solution. (Page S26)
- Fig. S19.** Ozone Water concentrations between the  $\text{Bi}_{12}\text{PbO}_{20}$ -3,  $\text{Bi}_{12}\text{PbO}_{20}$ -no NaOH,  $\text{Bi}_{12}\text{PbO}_{20}$ -no PVP and  $\beta\text{-PbO}_2$ . (Page S27)
- Fig. S20.** Moistened starch potassium iodide paper giving a qualitative comparison on the EOP of  $\text{Bi}_{12}\text{PbO}_{20}$ -3 at current density of  $50 \text{ mA cm}^{-2}$ . (Page S28)
- Fig. S21.** The  $\text{FE}_{\text{O}_2}$  of  $\text{Bi}_2\text{O}_3$ ,  $\text{Bi}_{12}\text{PbO}_{20}$ -n (n=1, 2, 3, 4 and 5) at  $50 \text{ mA cm}^{-2}$ . (Page S29)

**Fig. S22.** Ozone Gas concentrations between the  $\text{Bi}_{12}\text{PbO}_{20-3}$ ,  $\text{Bi}_{12}\text{PbO}_{20\text{-no NaOH}}$ ,  $\text{Bi}_{12}\text{PbO}_{20\text{-no PVP}}$  and  $\beta\text{-PbO}_2$ . (Page S30)

**Table. S6.** The performance comparison of  $\text{Bi}_{12}\text{PbO}_{20-3}$  with other electrocatalysts toward for EOP. (Page S31)

**Fig. S23.** CV at different scan rates in the region of 20-120 mV vs. RHE in saturated  $\text{K}_2\text{SO}_4$  of  $\text{Bi}_2\text{O}_3$ ,  $\text{Bi}_{12}\text{PbO}_{20-1, 2, 3, 4}$  and 5. (Page S32)

**Fig. S24.** Different scan rates to measure capacitive currents for  $\text{Bi}_2\text{O}_3$ ,  $\text{Bi}_{12}\text{PbO}_{20-1, 2, 3, 4}$  and 5. (Page S33)

**Fig. S25.** Nyquist plots of  $\text{Bi}_2\text{O}_3$ ,  $\text{Bi}_{12}\text{PbO}_{20-1, 2, 3, 4}$  and 5. (Page S34)

**Fig. S26.** ESR measurement results of  $\text{DMPO}\cdot\text{OH}$  for  $\text{Bi}_{12}\text{PbO}_{20-3}$  and  $\beta\text{-PbO}_2$ . (Page S35)

**Fig. S27.** SEM image of the  $\text{Bi}_{12}\text{PbO}_{20-3}$  after 100 h constant potential test for EOP. (Page S36)

**Fig. S28.** XRD pattern comparison before and after stability the  $\text{Bi}_{12}\text{PbO}_{20-3}$ . (Page S37)

**Table. S7.** Element contents of electrolyte after the reaction by ICP for Bi and Pb. (Page S38)

**Fig. S29. (a)** The photograph of the DEMS technique; **(b)** The photograph of the electrolysis cell for DMES measurement. (Page S39)

**Fig. S30.** The quantitative analysis of  $\text{O}_2$  and  $\text{O}_3$  by DEMS. (Page S40)

**Fig. S31. (a)** The mass spectrometry measurements result of  $\text{O}_3$ ; **(b-d)** Differential electrochemical mass spectrometry measurements of  $m/z=50$  ( $^{16}\text{O}^{18}\text{O}^{16}\text{O}$ ),  $m/z=52$  ( $^{18}\text{O}^{18}\text{O}^{16}\text{O}$ ),  $m/z=54$  ( $^{18}\text{O}^{18}\text{O}^{18}\text{O}$ ). (Page S41)

**Fig. S32. (a)** The Mass spectrometry measurements result of  $\text{O}_2$ ; **(b)** Differential electrochemical mass spectrometry measurements of  $m/z=36$  ( $^{18}\text{O}^{18}\text{O}$ ),  $m/z=34$  ( $^{18}\text{O}^{16}\text{O}$ ),  $m/z=32$  ( $^{16}\text{O}^{16}\text{O}$ ). (Page S42)

**Fig. S33. (a)** Bulk structure of  $\text{Bi}_2\text{O}_3$ ; **(b)** Bulk structure of  $\text{Bi}_{12}\text{PbO}_{20}$ . The purple spheres represent Bi atoms, the gray spheres represent Pb atoms, the red spheres represent O atoms, and the yellow spheres represent O atoms to make the model more intuitive. (Page S43)

**Fig. S34.** The optimized structure as well as the corresponding energies with different oxygen vacancy sites. (Page S44)

**Fig. S35. (a)** COHP analysis of  $\text{Bi}_{12}\text{PbO}_{20}$  and  $\text{Bi}_{12}\text{PbO}_{20-1\text{Ov-opt}}$ ; **(b)** Calculated charge density differences for  $\text{Bi}_{12}\text{PbO}_{20}$  bulk with different oxygen vacancy sites. (Page S45)

**Fig. S36.** Photograph of the electrochemical degradation system. (Page S46)

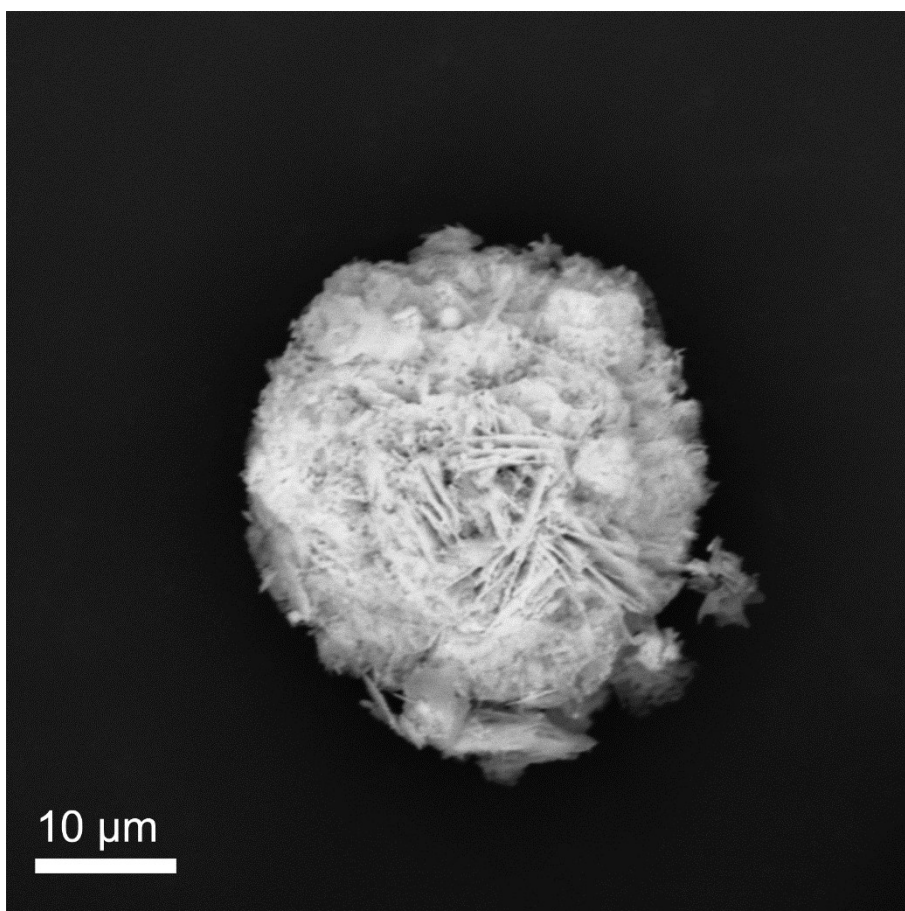

**Fig. S1.** SEM image of Bi<sub>2</sub>O<sub>3</sub> flower.

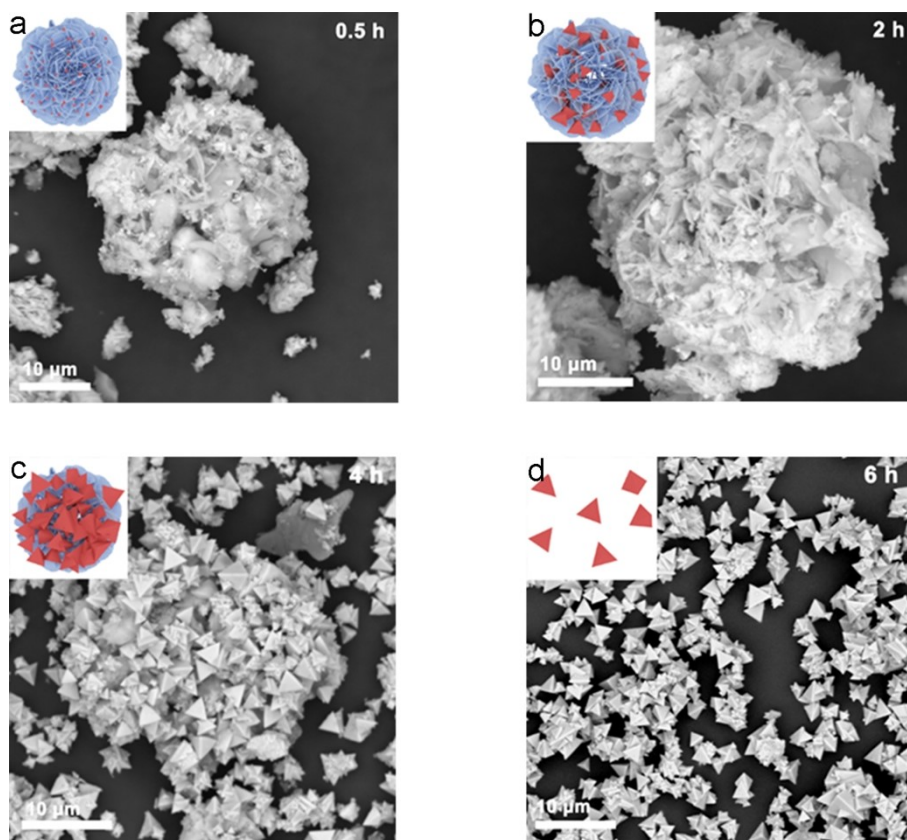

**Fig. S2.** SEM images of  $\text{Bi}_{12}\text{PbO}_{20}$  at different reaction time. **(a)** 0.5 h; **(b)** 2 h; **(c)** 4 h; **(d)** 6 h.

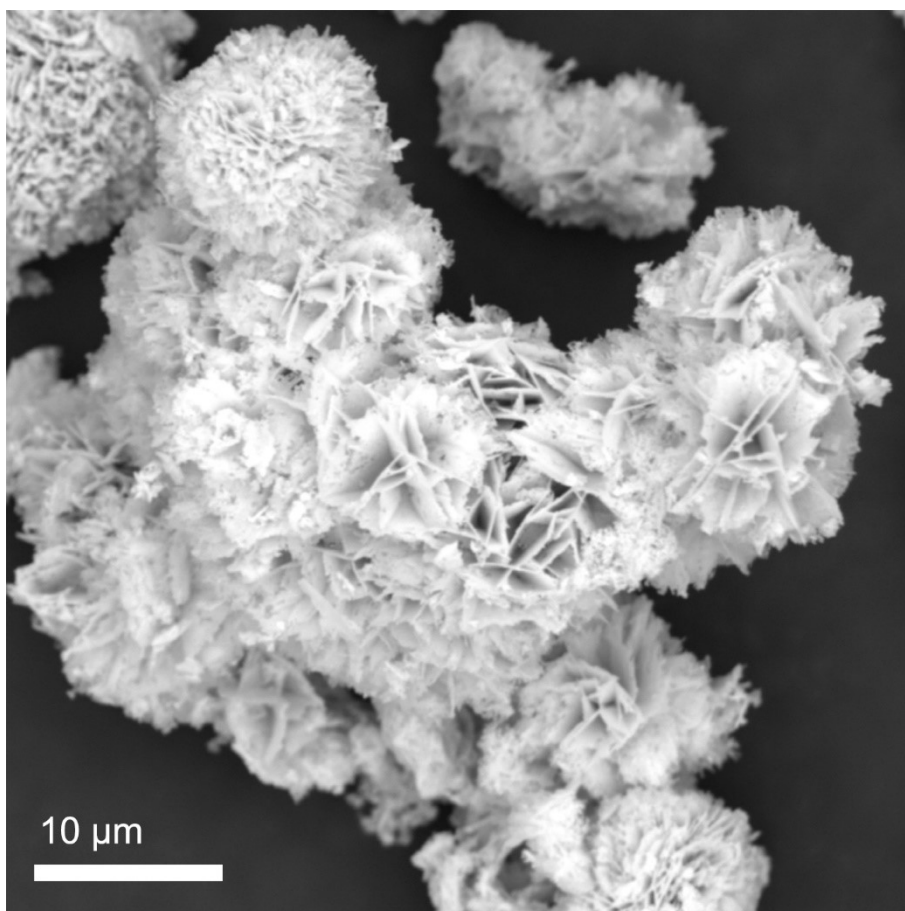

**Fig. S3.** SEM image of Bi<sub>12</sub>PbO<sub>20</sub>-no NaOH.

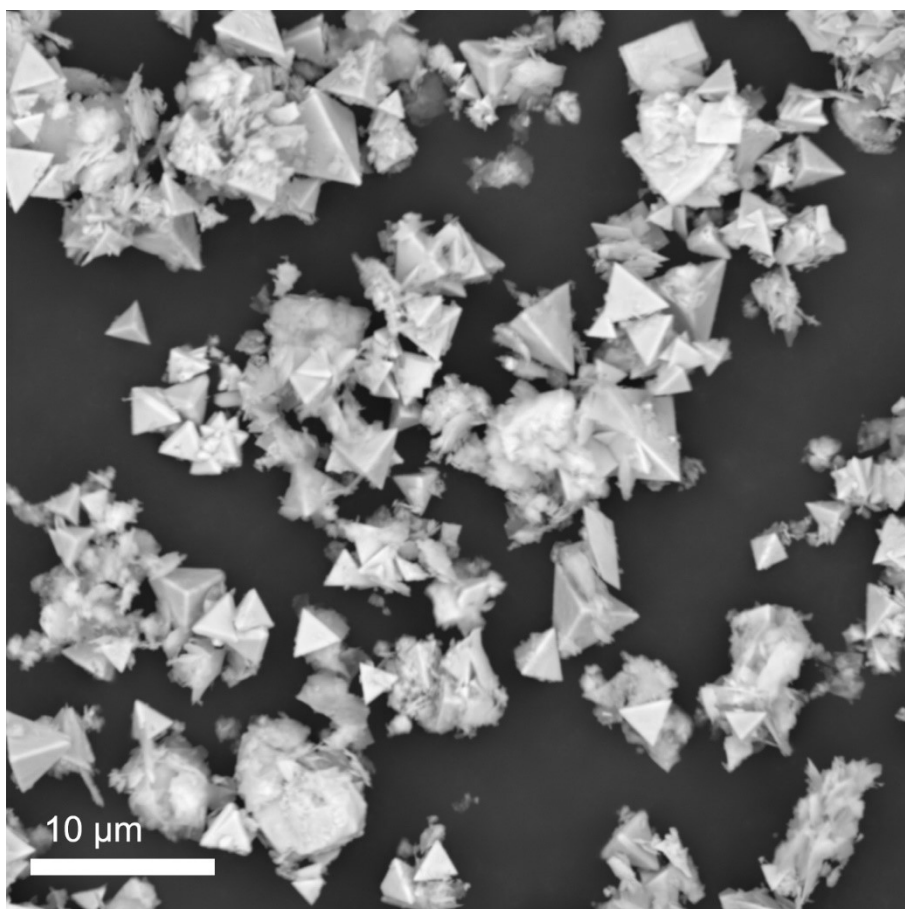

**Fig. S4.** SEM image of Bi<sub>12</sub>PbO<sub>20</sub>-no PVP.

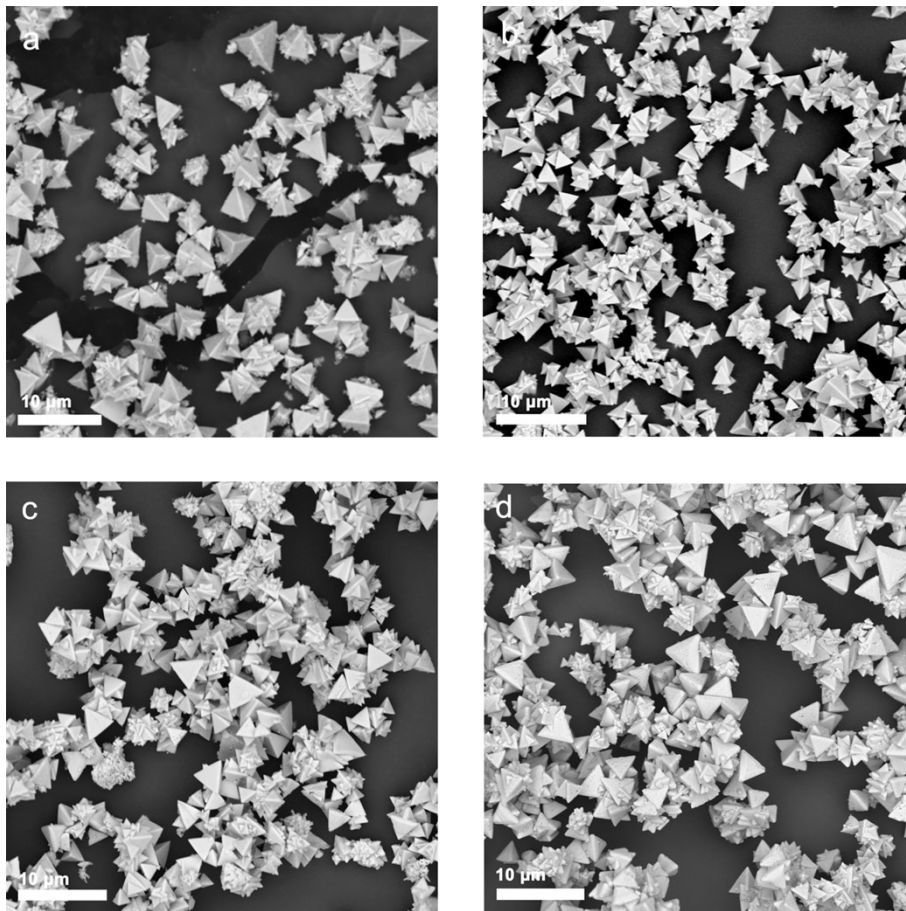

**Fig. S5.** SEM images of  $\text{Bi}_{12}\text{PbO}_{20-1, 2, 4}$  and 5.



**Table. S1.** Element contents of Bi<sub>12</sub>PbO<sub>20</sub>-1, 2, 3, 4 and 5 by ICP for Bi, Pb and XPS analysis for O content (mol. %).

| <b>Samples</b>                        | <b>Pb loading<br/>(mol. %)</b> | <b>Bi loading<br/>(mol. %)</b> | <b>O loading<br/>(mol. %)</b> |
|---------------------------------------|--------------------------------|--------------------------------|-------------------------------|
| Bi <sub>12</sub> PbO <sub>20</sub> -1 | 0.98                           | 37.39                          | 61.63                         |
| Bi <sub>12</sub> PbO <sub>20</sub> -2 | 1.22                           | 37.30                          | 61.48                         |
| Bi <sub>12</sub> PbO <sub>20</sub> -3 | 2.00                           | 37.08                          | 60.92                         |
| Bi <sub>12</sub> PbO <sub>20</sub> -4 | 2.44                           | 36.85                          | 60.71                         |
| Bi <sub>12</sub> PbO <sub>20</sub> -5 | 3.79                           | 36.30                          | 59.91                         |

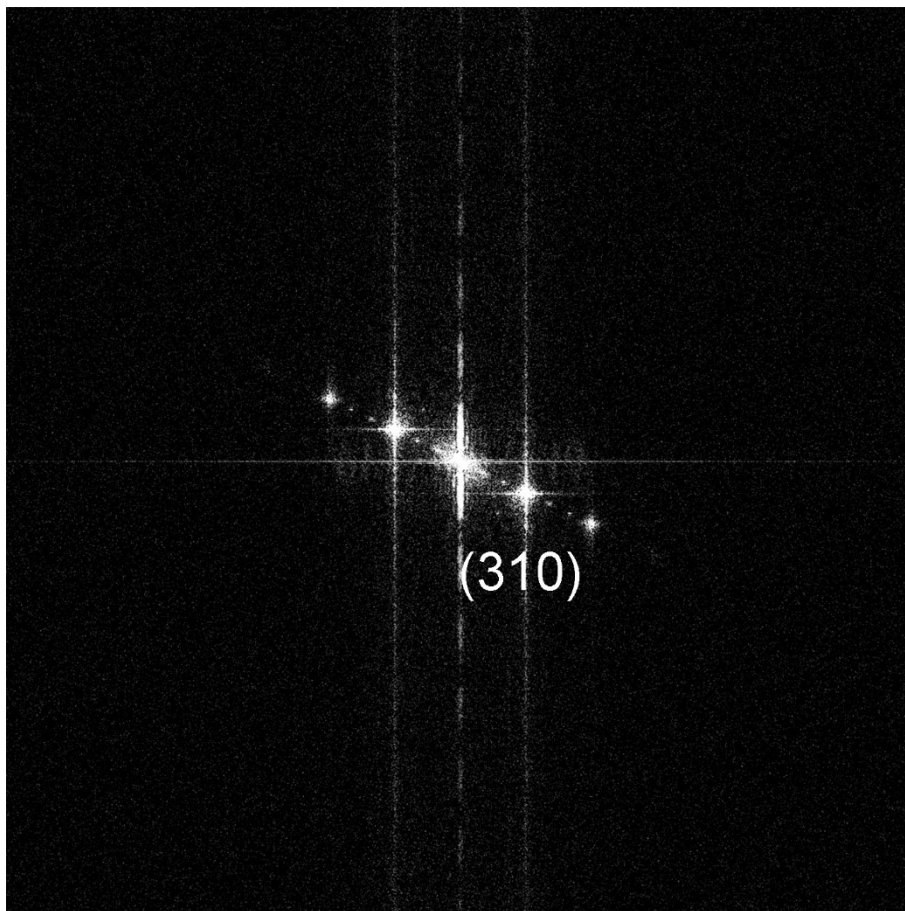

**Fig. S6.** The FFT pattern of Bi<sub>12</sub>PbO<sub>20-3</sub> by STEM.

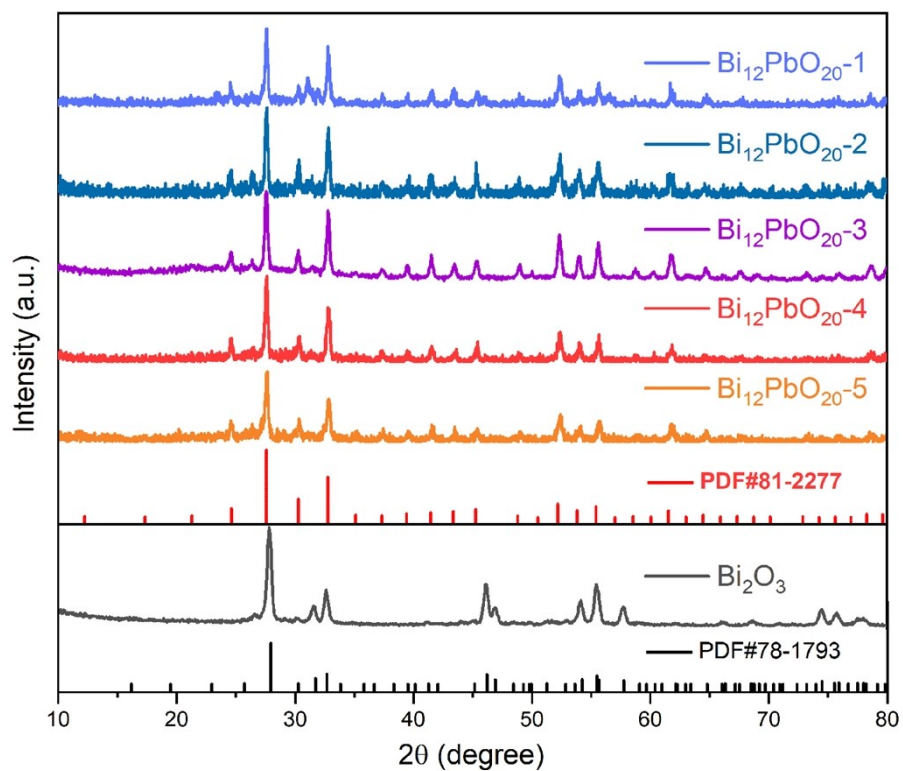

**Fig. S7.** XRD pattern of  $\text{Bi}_{12}\text{PbO}_{20}$ -1, 2, 3, 4, 5 and  $\text{Bi}_2\text{O}_3$ .

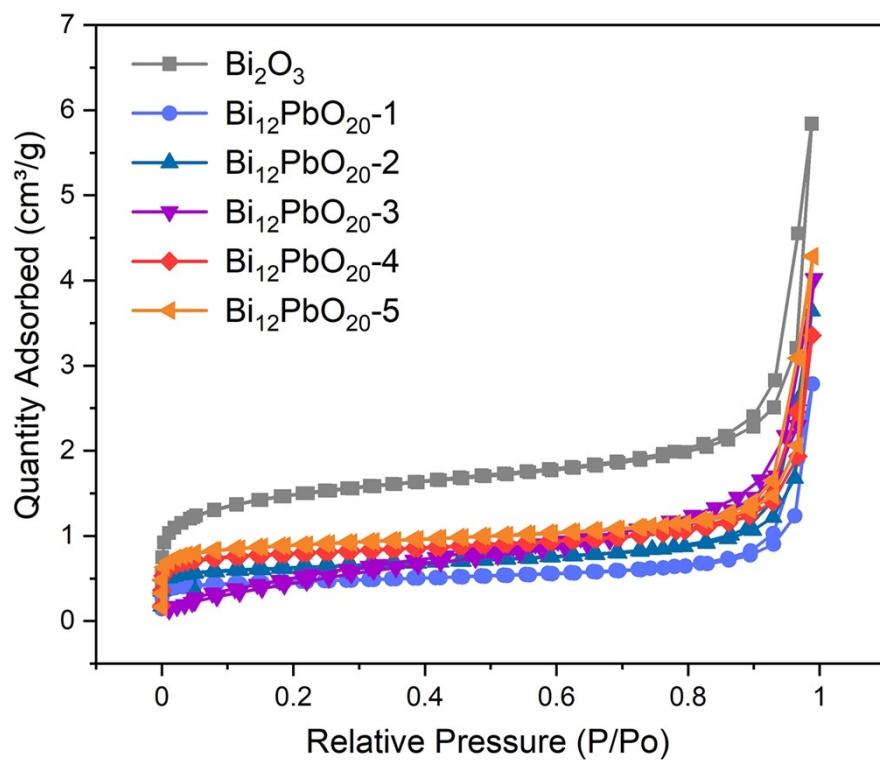

**Fig. S8.** N<sub>2</sub> adsorption-desorption isotherms of Bi<sub>12</sub>PbO<sub>20</sub>-1, 2, 3, 4, 5 and Bi<sub>2</sub>O<sub>3</sub>.

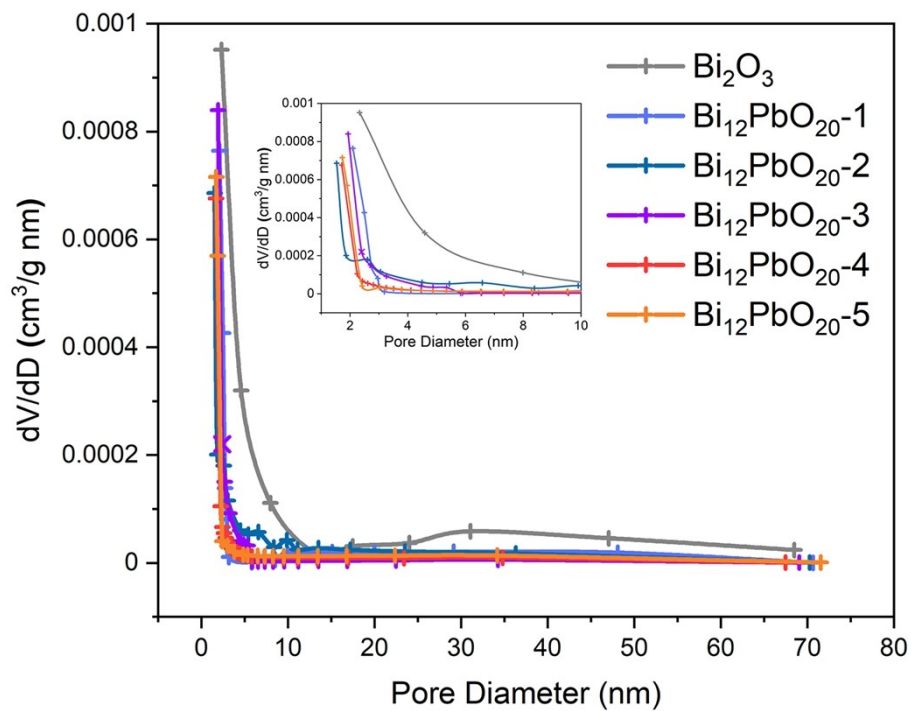

**Fig. S9.** The pore size distribution of  $\text{Bi}_{12}\text{PbO}_{20-1}$ , 2, 3, 4, 5 and  $\text{Bi}_2\text{O}_3$ .

**Table. S2.** Surface area and pore volume of Bi<sub>12</sub>PbO<sub>20</sub>-1, 2, 3, 4, 5 and Bi<sub>2</sub>O<sub>3</sub>.

| <b>Samples</b>                        | <b>Surface area (m<sup>2</sup> g<sup>-1</sup>)</b> | <b>Total pore Volume (cm<sup>3</sup> g<sup>-1</sup>)</b> |
|---------------------------------------|----------------------------------------------------|----------------------------------------------------------|
| Bi <sub>2</sub> O <sub>3</sub>        | 5.84                                               | 0.008180                                                 |
| Bi <sub>12</sub> PbO <sub>20</sub> -1 | 2.78                                               | 0.002434                                                 |
| Bi <sub>12</sub> PbO <sub>20</sub> -2 | 3.64                                               | 0.003936                                                 |
| Bi <sub>12</sub> PbO <sub>20</sub> -3 | 4.02                                               | 0.003094                                                 |
| Bi <sub>12</sub> PbO <sub>20</sub> -4 | 3.35                                               | 0.003651                                                 |
| Bi <sub>12</sub> PbO <sub>20</sub> -5 | 4.28                                               | 0.002934                                                 |

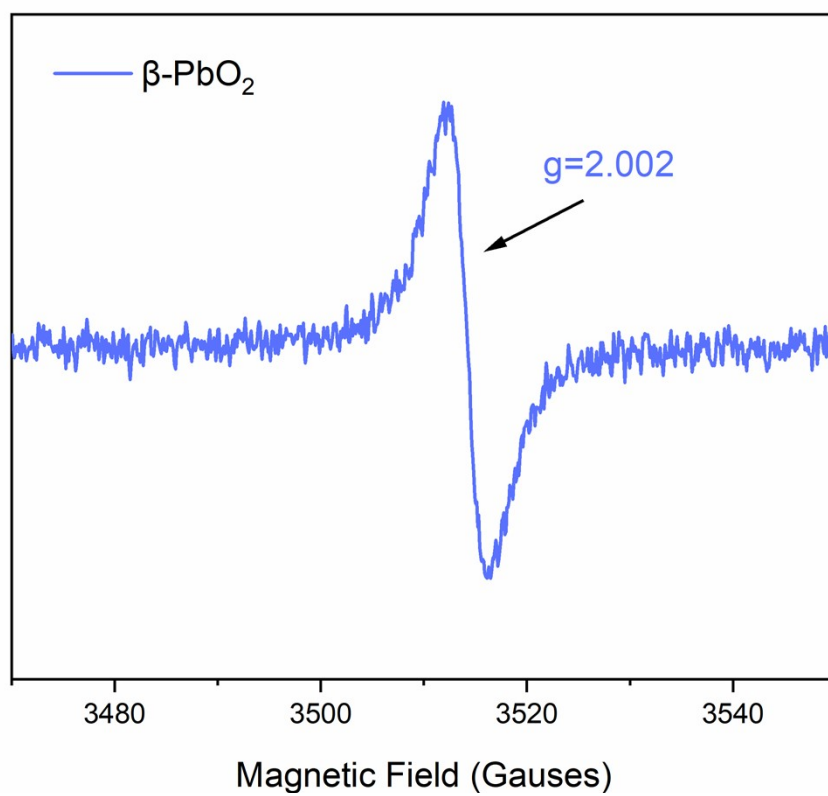

**Fig. S10.** Electron paramagnetic resonance test of  $\beta\text{-PbO}_2$

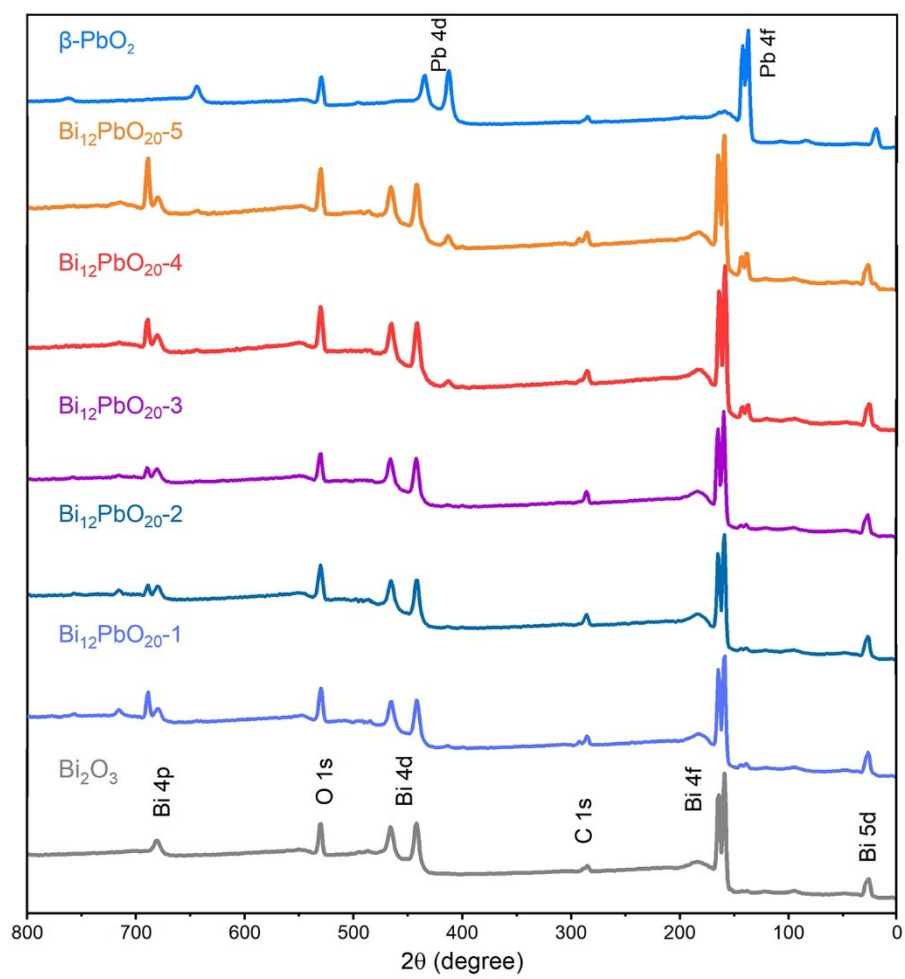

**Fig. S11.** XPS survey spectra of Bi<sub>2</sub>O<sub>3</sub>, Bi<sub>12</sub>PbO<sub>20</sub>-1, 2, 3, 4, 5 and  $\beta$ -PbO<sub>2</sub>.



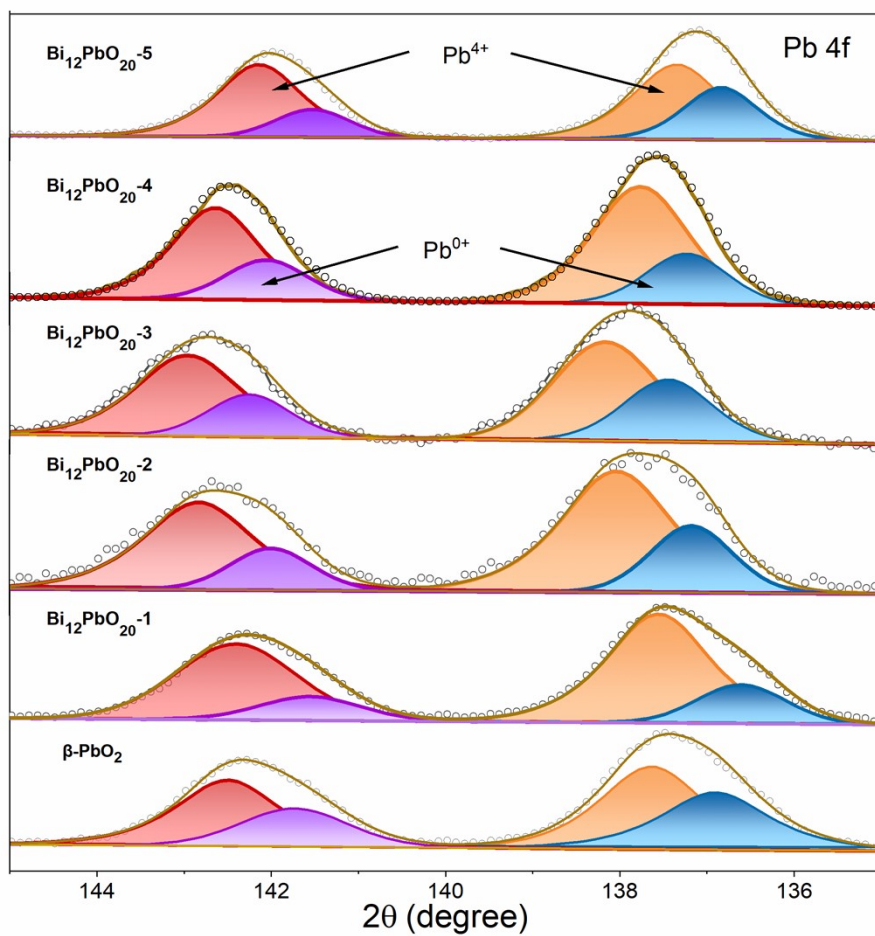

**Fig. S12.** High-resolution XPS spectra of Pb 4f for  $\text{Bi}_{12}\text{PbO}_{20-1}$ , 2, 3, 4, 5 and  $\beta\text{-PbO}_2$ .

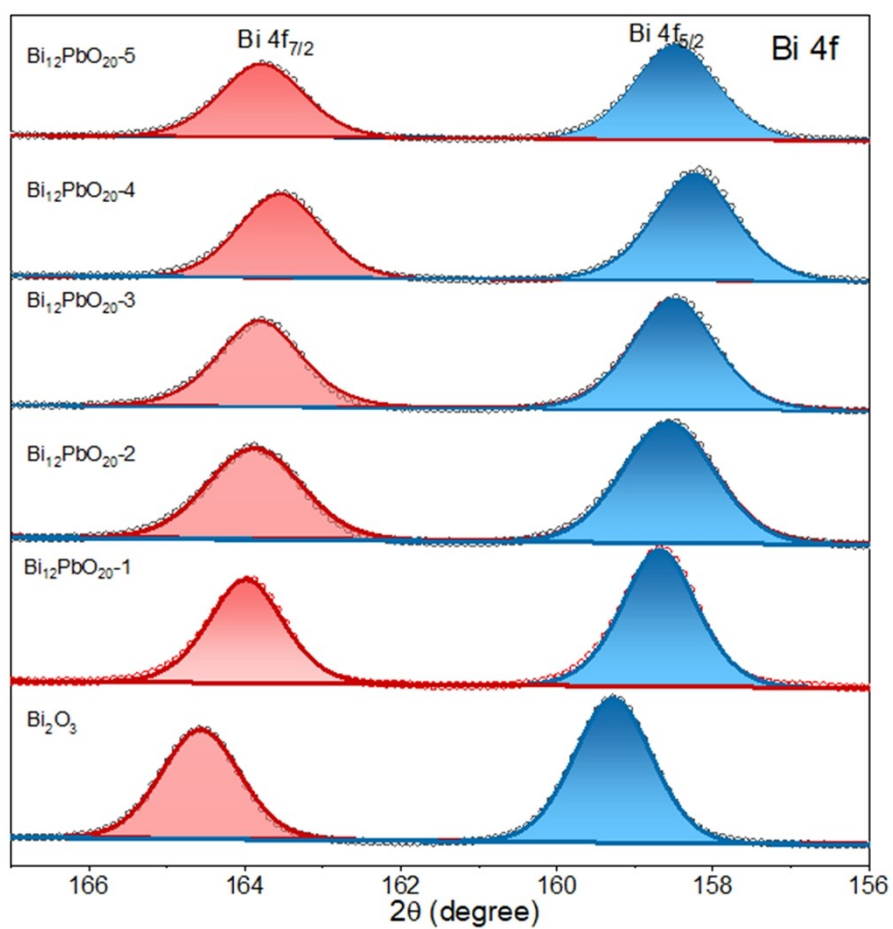

**Fig. S13.** High-resolution XPS spectra of Bi 4f for  $\text{Bi}_2\text{O}_3$ ,  $\text{Bi}_{12}\text{PbO}_{20-1}$ , 2, 3, 4 and 5.

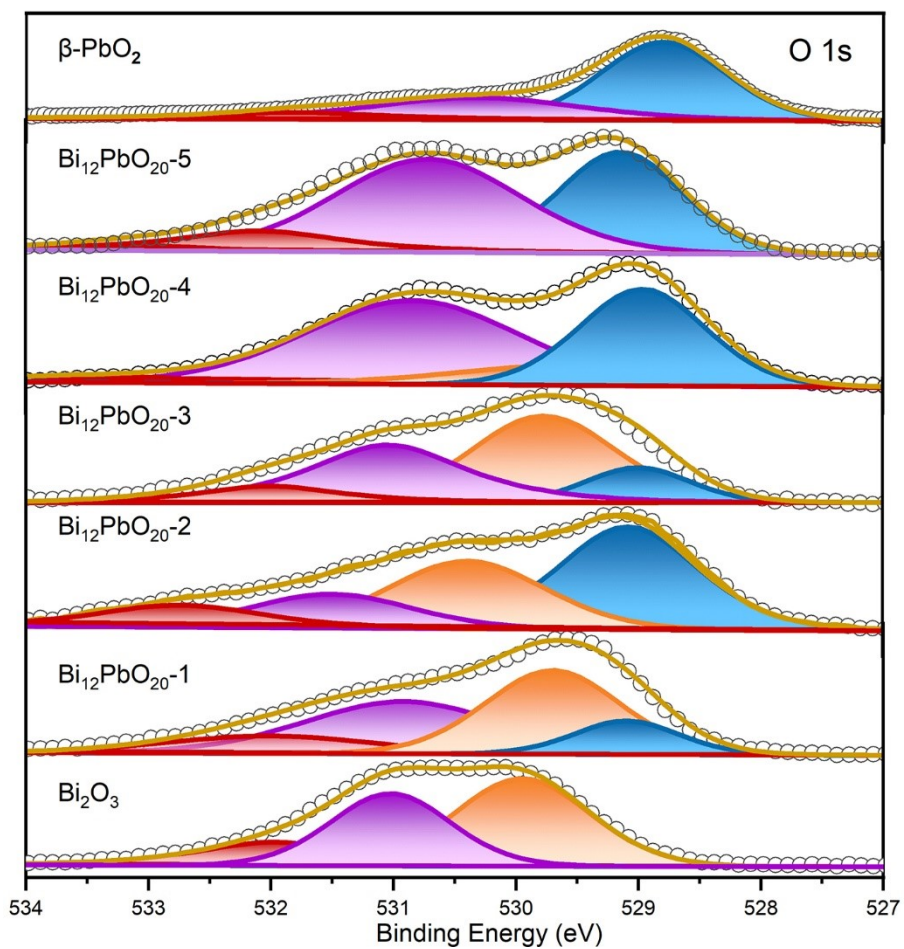

**Fig. S14.** High-resolution XPS spectra of O 1s for  $\text{Bi}_2\text{O}_3$ ,  $\text{Bi}_{12}\text{PbO}_{20}\text{-1}$ , 2, 3, 4, 5 and  $\beta\text{-PbO}_2$ .

**Table. S3.** Summary of functional groups for Bi<sub>12</sub>PbO<sub>20-3</sub> obtained from XPS analysis.

| Pb 4f functional groups | Binding energy (eV) |       | Relative intensity (%) |
|-------------------------|---------------------|-------|------------------------|
| Pb <sup>4+</sup>        | 138.1               | 142.9 | 68.83                  |
| Pb <sup>0</sup>         | 137.5               | 142.3 | 31.17                  |

  

| O 1s functional groups | Binding energy (eV) |  | Relative intensity (%) |
|------------------------|---------------------|--|------------------------|
| Pb-O                   | 529.0               |  | 12.95                  |
| Bi-O                   | 529.8               |  | 46.90                  |
| Adsorb O               | 531.2               |  | 29.39                  |
| OH                     | 532.3               |  | 10.75                  |

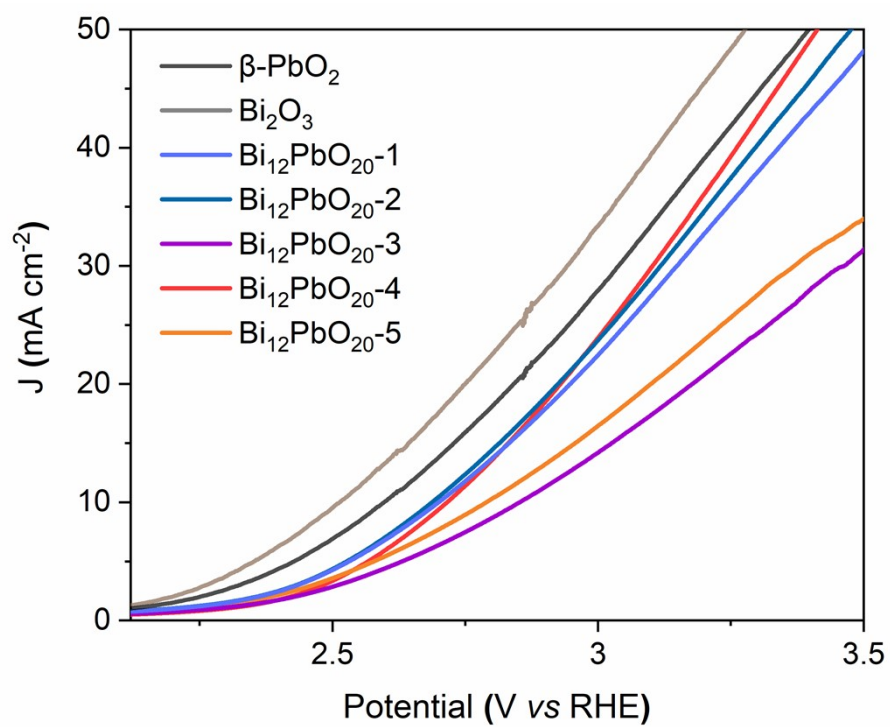

**Fig. S15.** Steady state polarization curves of Bi<sub>12</sub>PbO<sub>20</sub>-n (n = 1, 2, 3, 4, 5),  $\beta$ -PbO<sub>2</sub>, and Bi<sub>2</sub>O<sub>3</sub> after 2.12 V vs.RHE

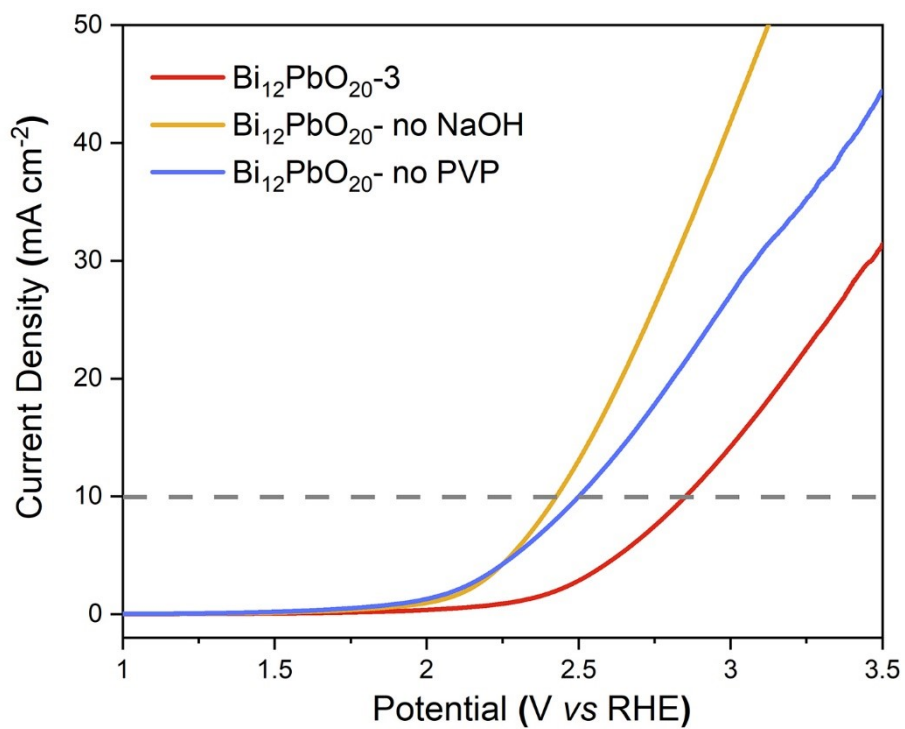

**Fig. S16.** Steady-state polarization curves for Bi<sub>12</sub>PbO<sub>20</sub>-3, Bi<sub>12</sub>PbO<sub>20</sub>-no NaOH and no PVP.

**Table. S4.** Summary of the Electrochemical Properties of prepared Electrode.

| <b>Catalysts</b>                         | <b>Tafel Slope<br/>(mV dec<sup>-1</sup>)</b> | <b>J<sub>0</sub>, geometric<br/>(mA cm<sup>-2</sup>)</b> | <b>C<sub>dl</sub><br/>(mF cm<sup>-2</sup>)</b> | <b>Relative<br/>surface area</b> | <b>J<sub>0</sub>, normalized<br/>(mA cm<sup>-2</sup>)</b> |
|------------------------------------------|----------------------------------------------|----------------------------------------------------------|------------------------------------------------|----------------------------------|-----------------------------------------------------------|
| <b>Bi<sub>2</sub>O<sub>3</sub></b>       | 548                                          | 2052                                                     | 2.2                                            | 1.00                             | 2052                                                      |
| <b>Bi<sub>12</sub>PbO<sub>20</sub>-1</b> | 621                                          | 2184                                                     | 5.9                                            | 2.68                             | 780                                                       |
| <b>Bi<sub>12</sub>PbO<sub>20</sub>-2</b> | 637                                          | 2172                                                     | 4.6                                            | 2.09                             | 1039                                                      |
| <b>Bi<sub>12</sub>PbO<sub>20</sub>-3</b> | 667                                          | 2263                                                     | 4.5                                            | 2.05                             | 1104                                                      |
| <b>Bi<sub>12</sub>PbO<sub>20</sub>-4</b> | 617                                          | 2286                                                     | 3.1                                            | 1.41                             | 1621                                                      |
| <b>Bi<sub>12</sub>PbO<sub>20</sub>-5</b> | 580                                          | 2203                                                     | 2.9                                            | 1.32                             | 1669                                                      |

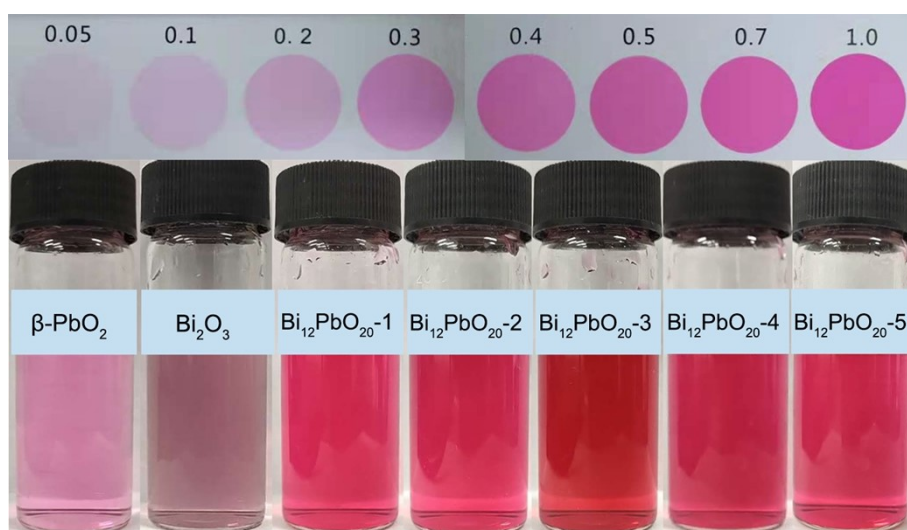

**Fig. S17.** Qualitative concentration test of ozone water, the color depth represents the concentration of ozone. Give a qualitative comparison on the concentration of dissolved ozone.



**Table. S5.** The anode voltage corresponding to different cell voltage.

| <b>Cell voltage (V)</b> | <b>Anode voltage (V)</b> |
|-------------------------|--------------------------|
| 1.5                     | 1.315                    |
| 2.0                     | 1.542                    |
| 2.5                     | 1.846                    |
| 3.0                     | 2.159                    |
| 3.5                     | 2.390                    |

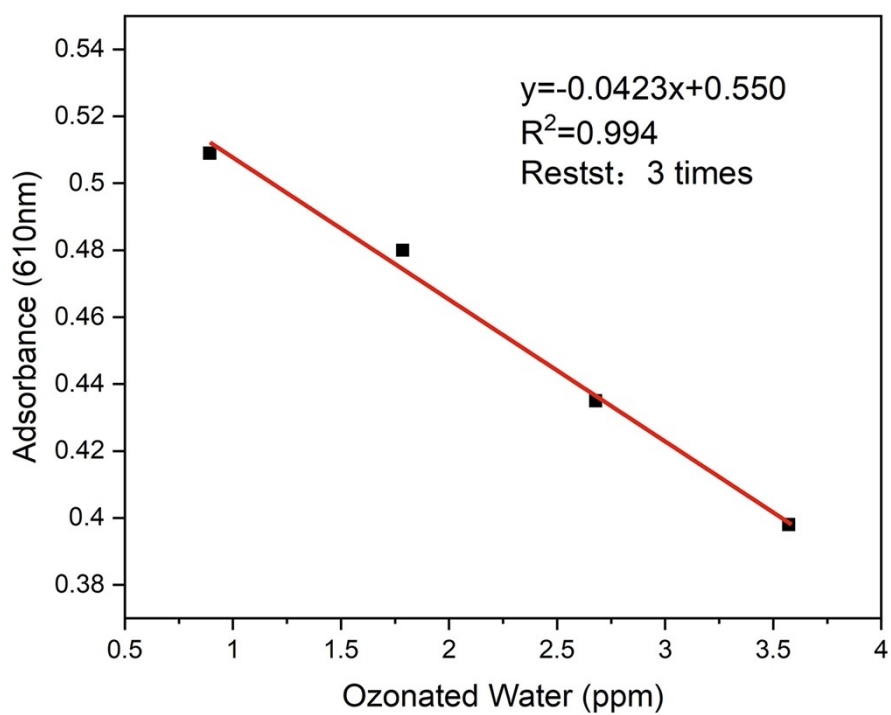

**Fig. S18.** The standard curve of ozonated water concentration in saturated  $K_2SO_4$  solution.

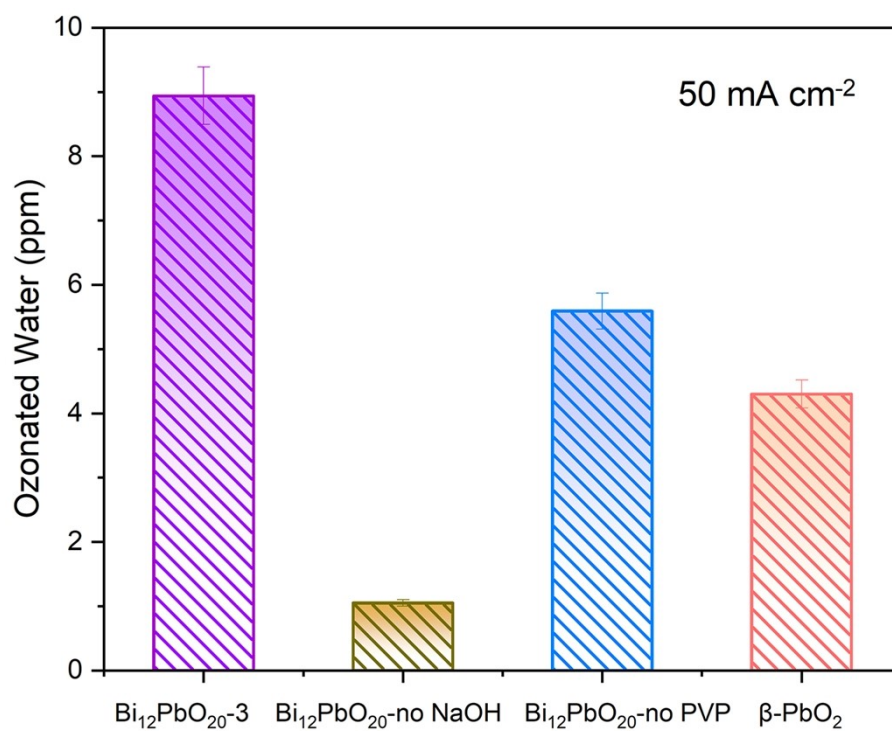

**Fig. S19.** Ozone Water concentrations between the Bi<sub>12</sub>PbO<sub>20</sub>-3, Bi<sub>12</sub>PbO<sub>20</sub>-no NaOH, Bi<sub>12</sub>PbO<sub>20</sub>-no PVP and β-PbO<sub>2</sub>.

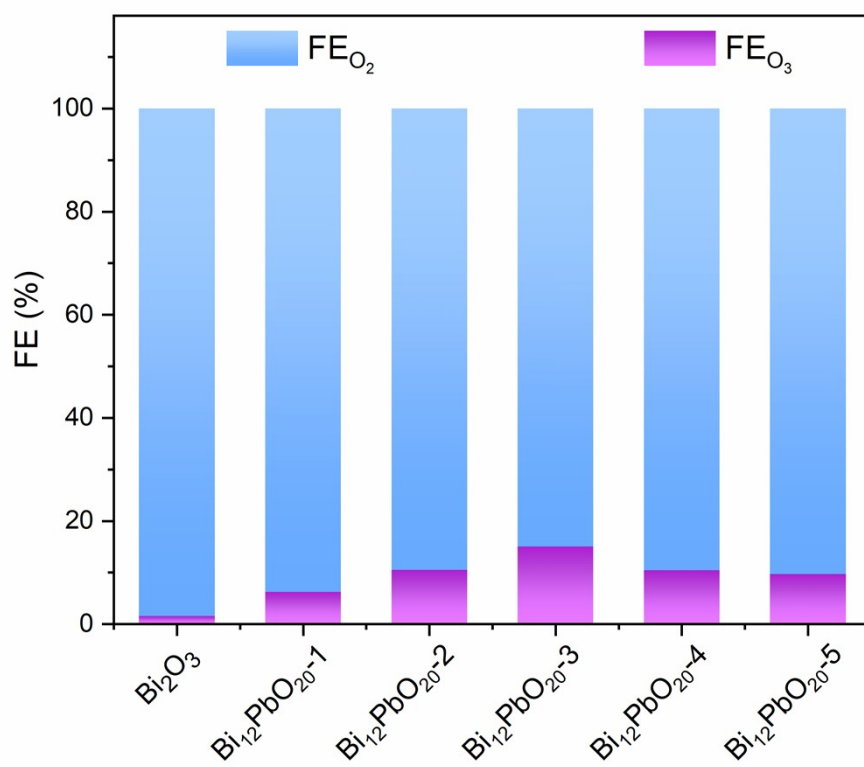

**Fig. S20.** The FE<sub>O<sub>2</sub></sub> of Bi<sub>2</sub>O<sub>3</sub>, Bi<sub>12</sub>PbO<sub>x</sub>-n (n=1, 2, 3, 4 and 5) at 50 mA cm<sup>-2</sup>

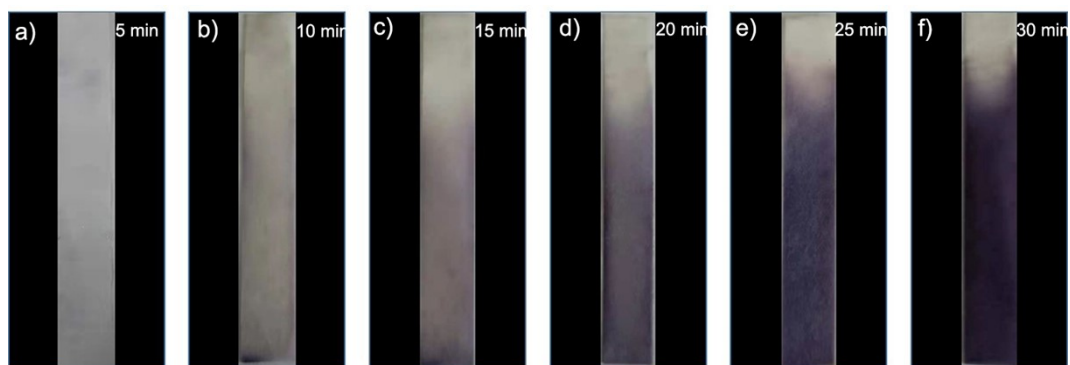

**Fig. S21.** Moistened starch potassium iodide paper giving a qualitative comparison on the EOP of  $\text{Bi}_{12}\text{PbO}_{20-3}$  at current density of  $50 \text{ mA cm}^{-2}$ .

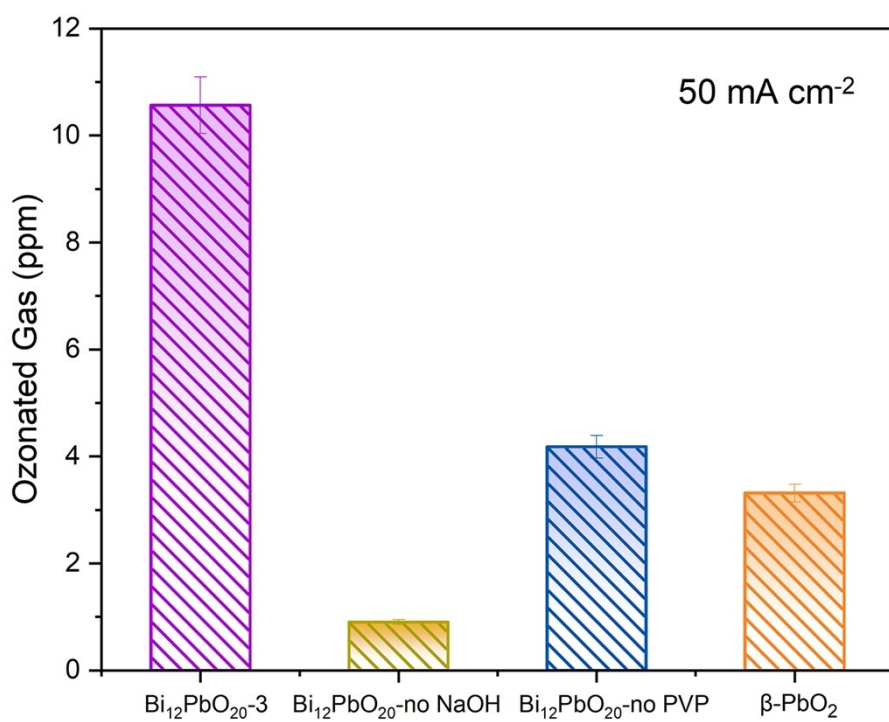

**Fig. S22.** Ozone Gas concentrations between the Bi<sub>12</sub>PbO<sub>20</sub>-3, Bi<sub>12</sub>PbO<sub>20</sub>-no NaOH, Bi<sub>12</sub>PbO<sub>20</sub>-no PVP and β-PbO<sub>2</sub>.

**Table. S6.** The performance comparison of Bi<sub>12</sub>PbO<sub>20-3</sub> with other electrocatalysts toward for EOP.

| Catalysts                                | Electrolyte          | Temperature  | FE (%)      | Ref.                                                    |
|------------------------------------------|----------------------|--------------|-------------|---------------------------------------------------------|
| <b>Bi<sub>12</sub>PbO<sub>20-3</sub></b> | <b>Neutral media</b> | <b>25 °C</b> | <b>15.1</b> | <b>This work</b>                                        |
| $\beta$ -PbO <sub>2</sub> -150 NRs       | Neutral media        | 25 °C        | 11.8        | <i>J. Mater. Chem. A</i> , 9010–9017 (2021)             |
| Pt-TaO <sub>x</sub> /Ti                  | Neutral media        | 25 °C        | 11.7        | <i>Electrochem. Commun.</i> <b>8</b> , 1263-1269 (2006) |
| Si/TiO <sub>x</sub> /Pt/TiO <sub>2</sub> | Acid medium          | 25 °C        | 9           | <i>J. Electrochem. Soc.</i> <b>157</b> , F30 (2010).    |
| PtZn/Zn-N-C                              | Neutral media        | 25 °C        | 4.2         | <i>J. Energy Chem.</i> <b>51</b> , 312-322 (2020)       |
| Pt-Reticulater<br>Vitreous<br>Carbon     | Neutral media        | 25 °C        | 1.6         | <i>J. Electrochem. Soc.</i> <b>153</b> D207-D212 (2006) |

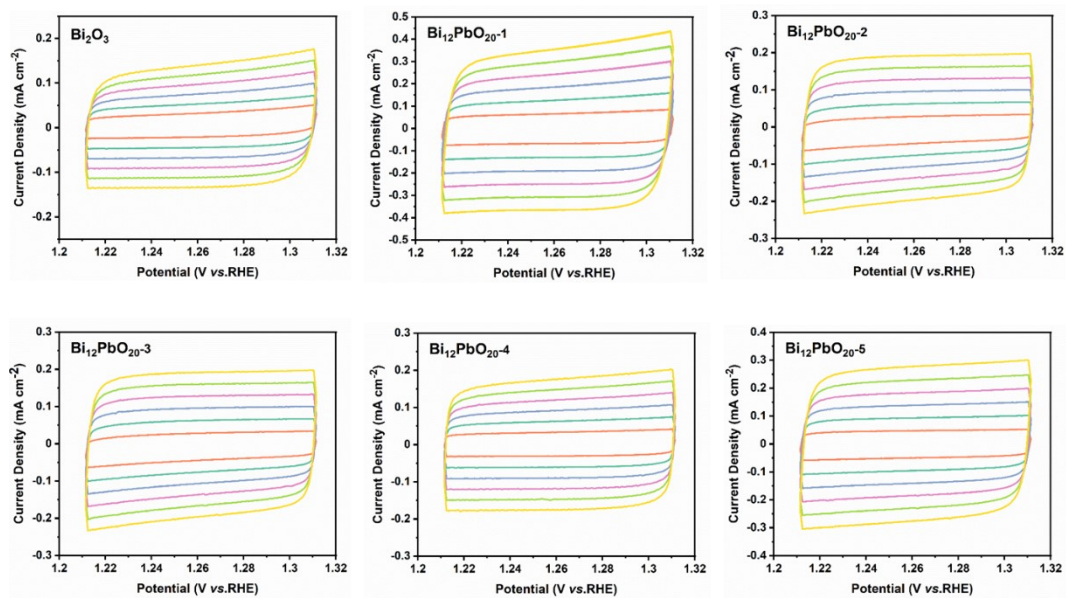

**Fig. S23.** CV at different scan rates in the region of 20-120 mV vs. RHE in saturated  $K_2SO_4$  of  $Bi_2O_3$ ,  $Bi_{12}PbO_{20-1}$ , 2, 3, 4 and 5.



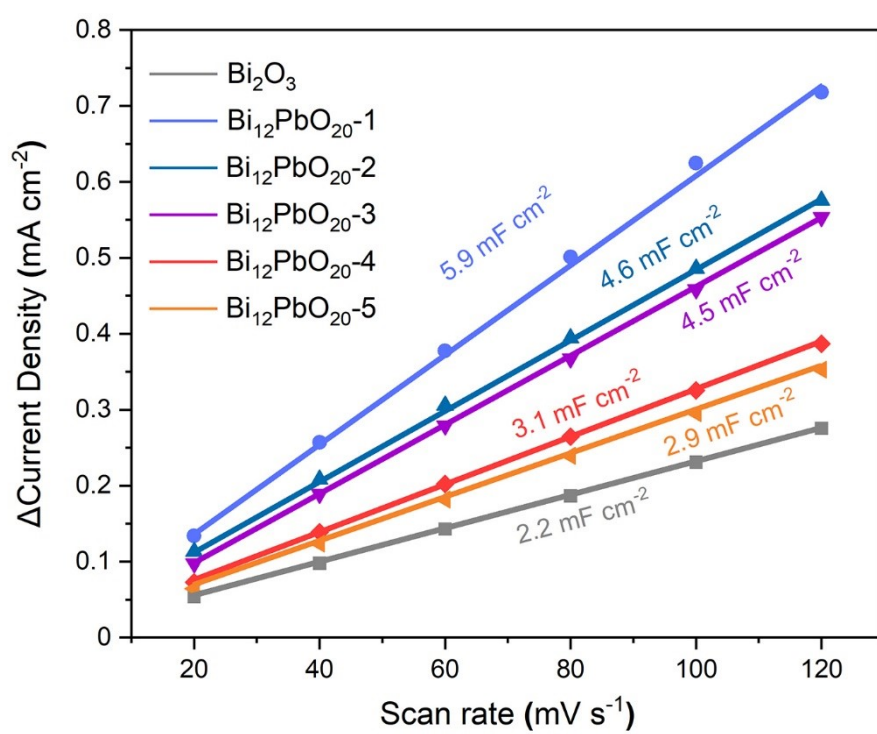

**Fig. S24.** Different scan rates to measure capacitive currents for Bi<sub>2</sub>O<sub>3</sub>, Bi<sub>12</sub>PbO<sub>20</sub>-1, 2, 3, 4 and 5.

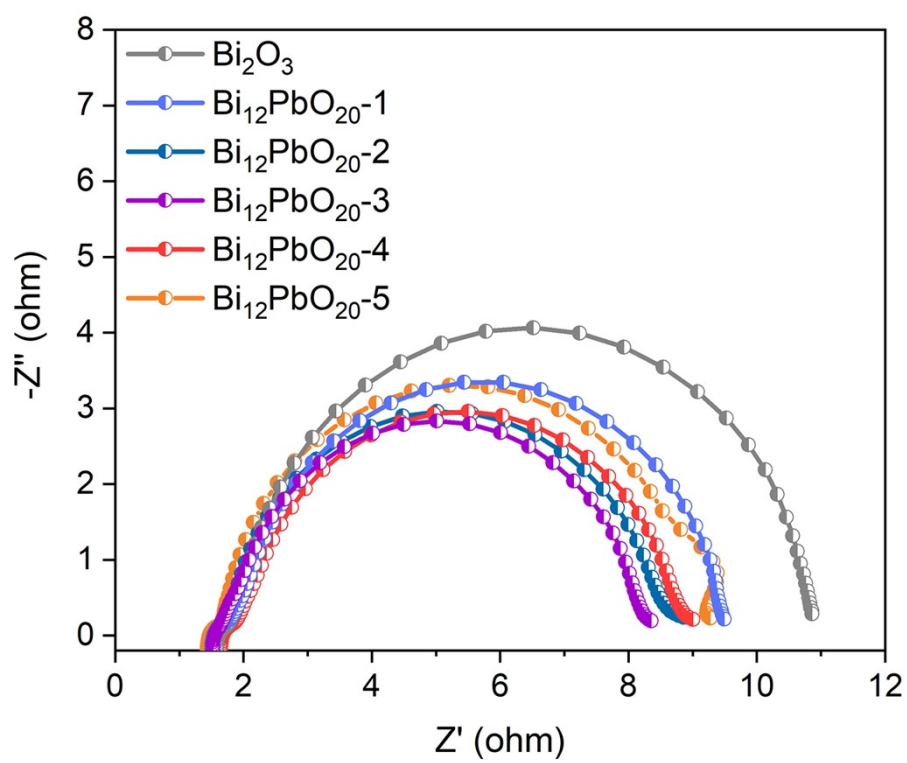

**Fig. S25.** Nyquist plots of  $\text{Bi}_2\text{O}_3$ ,  $\text{Bi}_{12}\text{PbO}_{20}$ -1, 2, 3, 4 and 5.

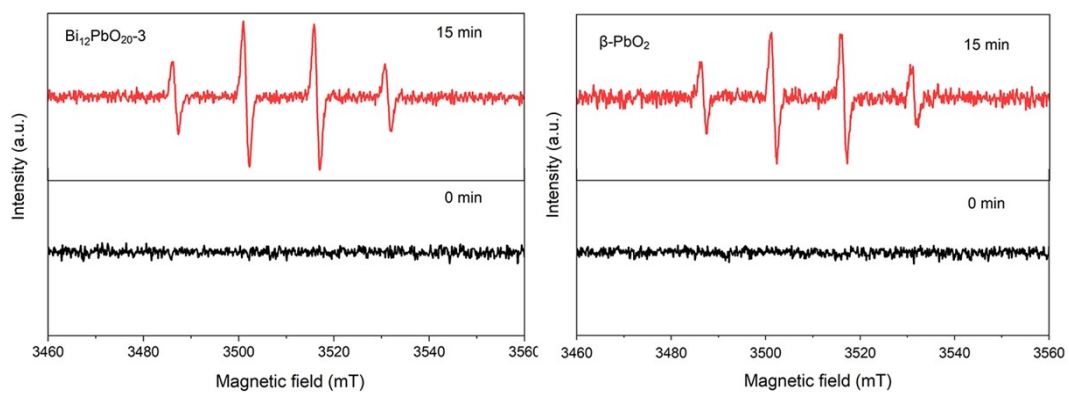

**Fig. S26.** ESR measurement results of DMPO-·OH for  $\text{Bi}_{12}\text{PbO}_{20-3}$  and  $\beta\text{-PbO}_2$ .

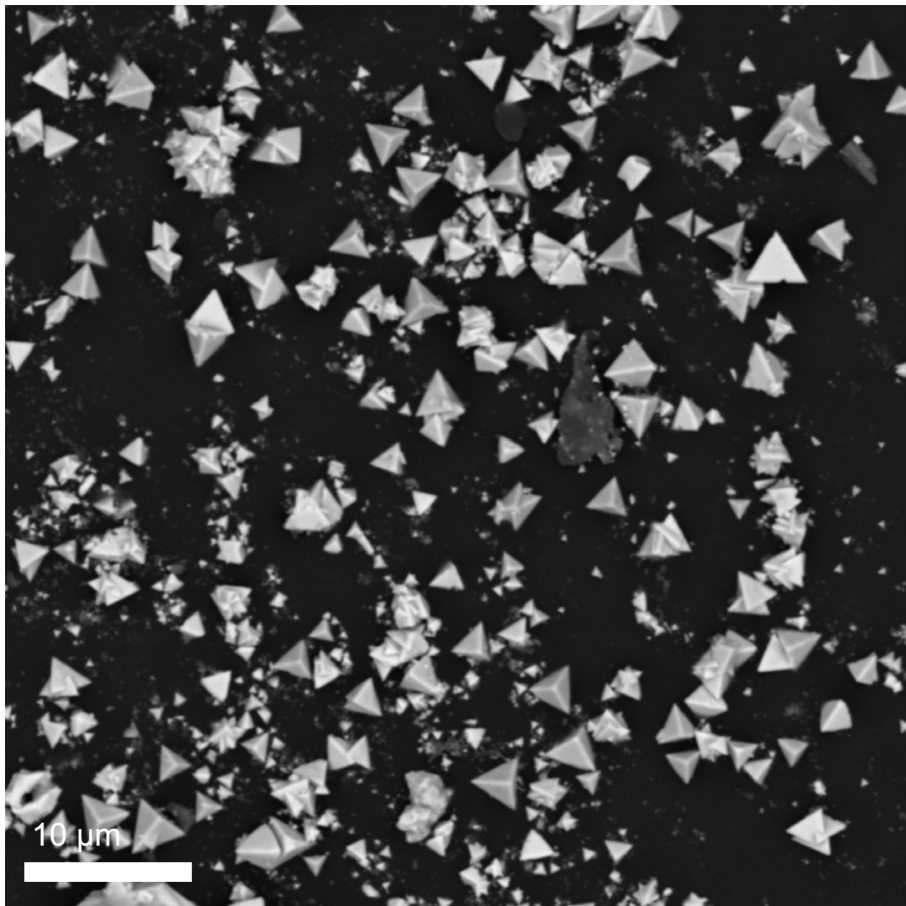

**Fig. S27.** SEM image of the  $\text{Bi}_{12}\text{PbO}_{20-3}$  after 100 h constant potential test for EOP.

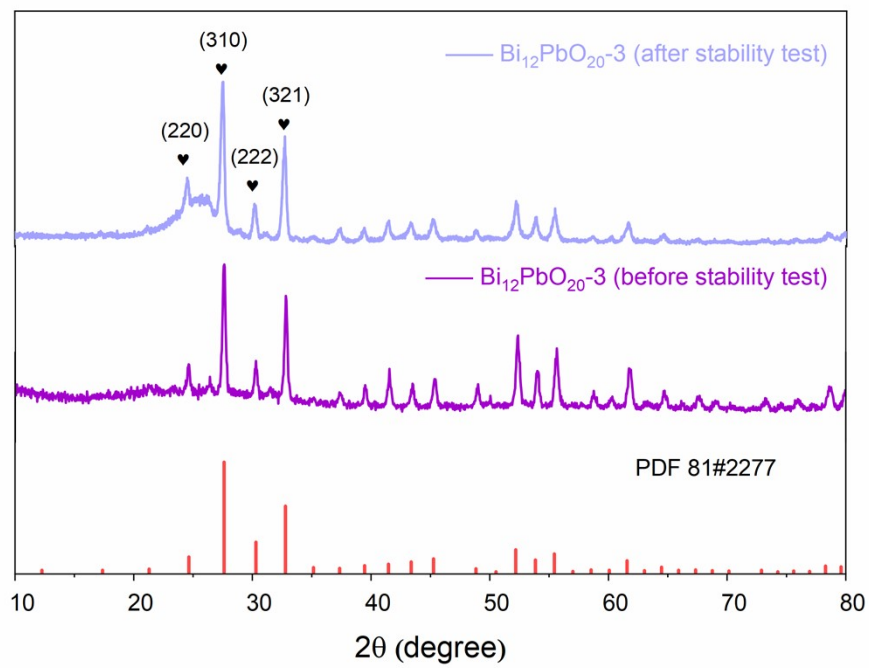

**Fig. S28.** XRD pattern comparison before and after stability the Bi<sub>12</sub>PbO<sub>20</sub>-3.

**Table. S7.** Element contents of electrolyte after the reaction by ICP for Bi and Pb

| <b>Samples</b>                        | <b>Pb<br/>(ppm)</b> | <b>Bi<br/>(ppm)</b> |
|---------------------------------------|---------------------|---------------------|
| The electrolyte<br>after the reaction | 0.0144              | 0.0312              |

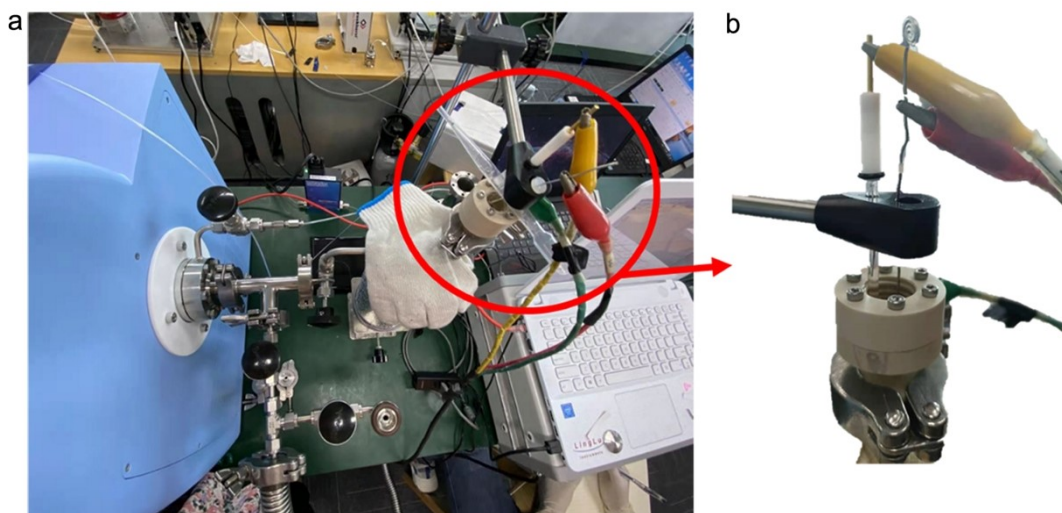

**Fig. S29.** (a) The photograph of the DEMS technique; (b) The photograph of the electrolysis cell for DMES measurement.

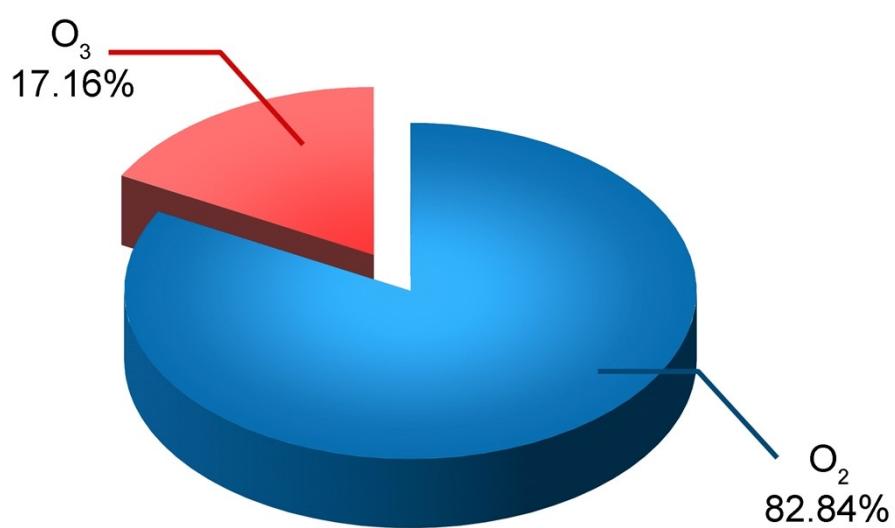

**Fig. S30.** The quantitative analysis of O<sub>2</sub> and O<sub>3</sub> by DEMS.



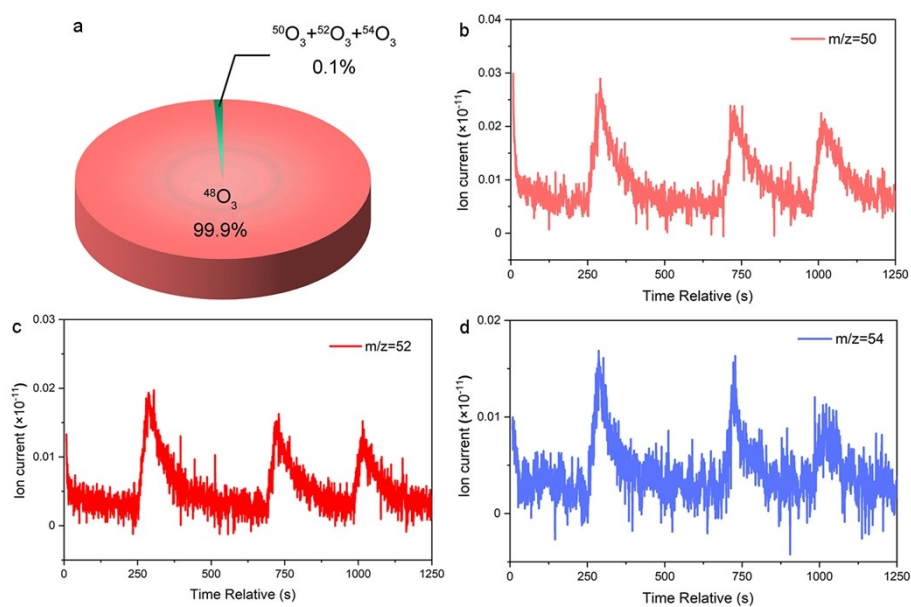

**Fig. S31.** (a) The mass spectrometry measurements result of  $O_3$ ; (b-d) Differential electrochemical mass spectrometry measurements of  $m/z=50$  ( $^{16}O^{18}O^{16}O$ ),  $m/z=52$  ( $^{18}O^{18}O^{16}O$ ),  $m/z=54$  ( $^{18}O^{18}O^{18}O$ ).

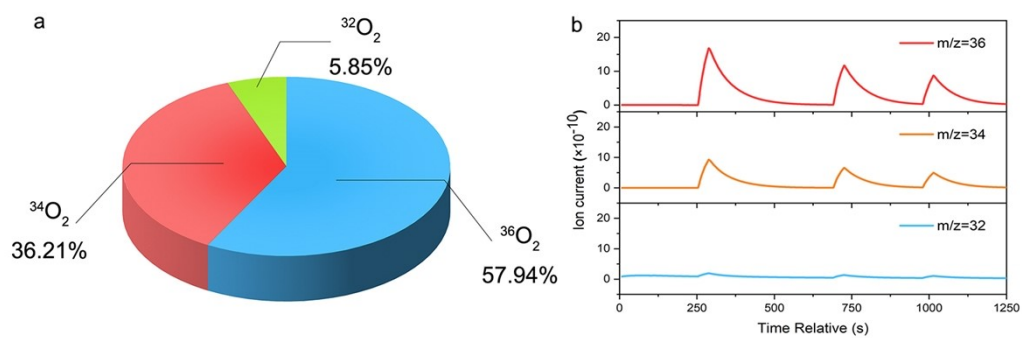

**Fig. S32. (a)** The Mass spectrometry measurements result of  $O_2$ ; **(b)** Differential electrochemical mass spectrometry measurements of  $m/z=36$  ( $^{18}O^{18}O$ ),  $m/z=34$  ( $^{18}O^{16}O$ ),  $m/z=32$  ( $^{16}O^{16}O$ ).

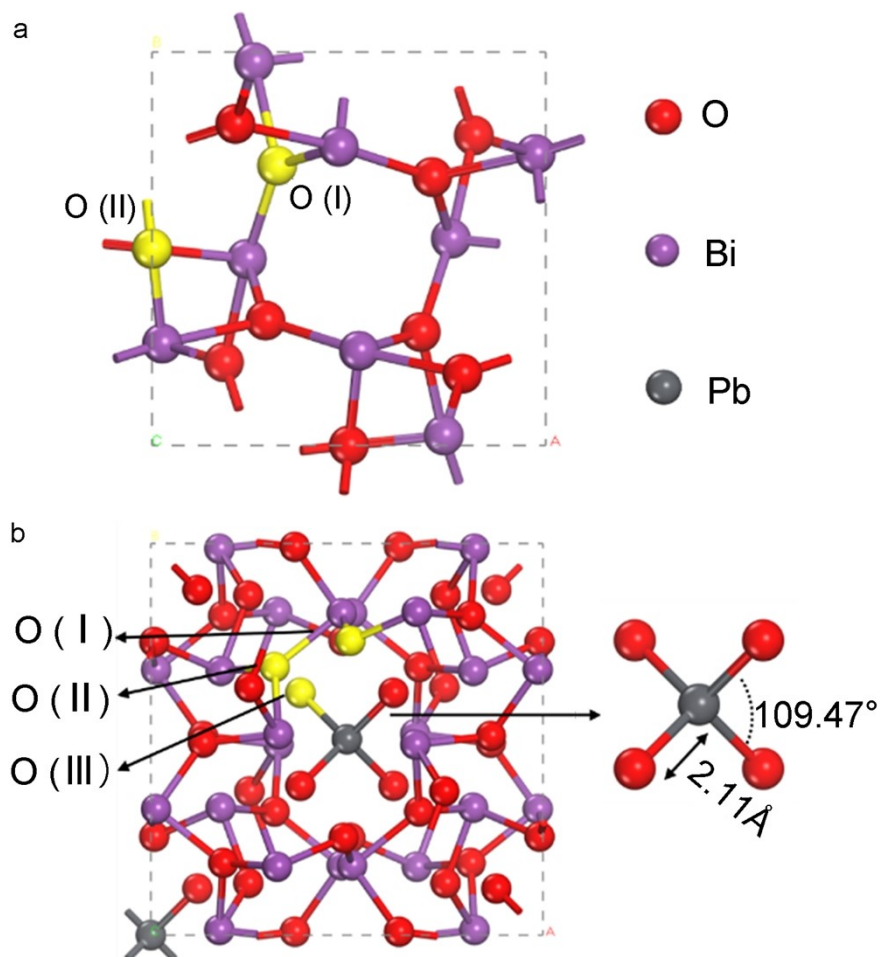

**Fig. S33.** (a) Bulk structure of  $\text{Bi}_2\text{O}_3$ ; (b) Bulk structure of  $\text{Bi}_{12}\text{PbO}_{20}$ . The purple spheres represent Bi atoms, the gray spheres represent Pb atoms, the red spheres represent O atoms, and the yellow spheres represent O atoms to make the model more intuitive.

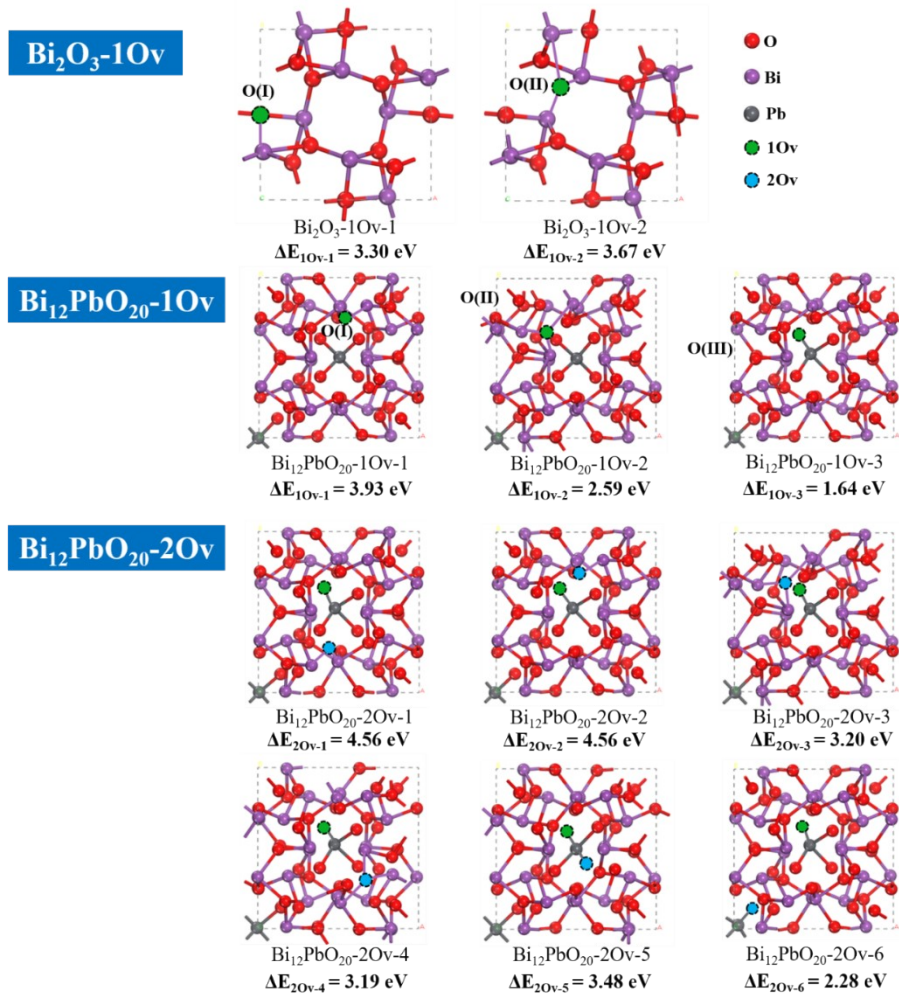

**Fig. S34.** The optimized structure as well as the corresponding energies with different oxygen vacancy sites.

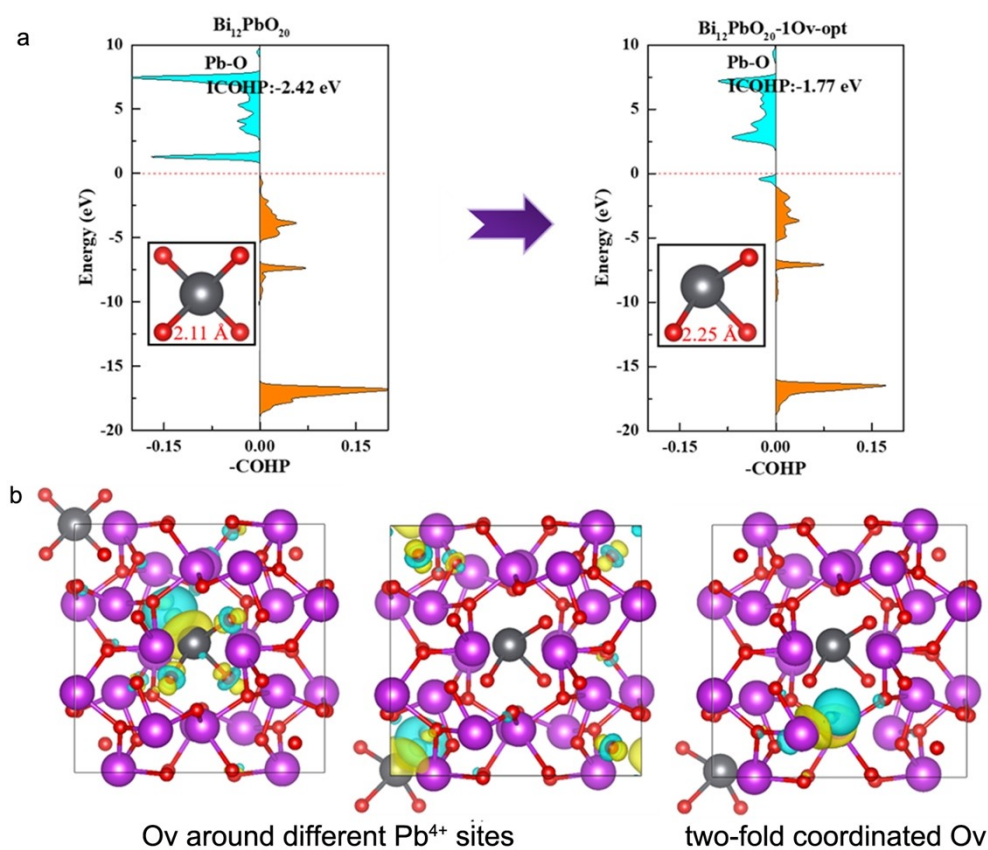

**Fig. S35.** (a) COHP analysis of  $\text{Bi}_{12}\text{PbO}_{20}$  and  $\text{Bi}_{12}\text{PbO}_{20}\text{-1Ov-opt}$ ; (b) Calculated charge density differences for  $\text{Bi}_{12}\text{PbO}_{20}$  bulk with different oxygen vacancy sites.

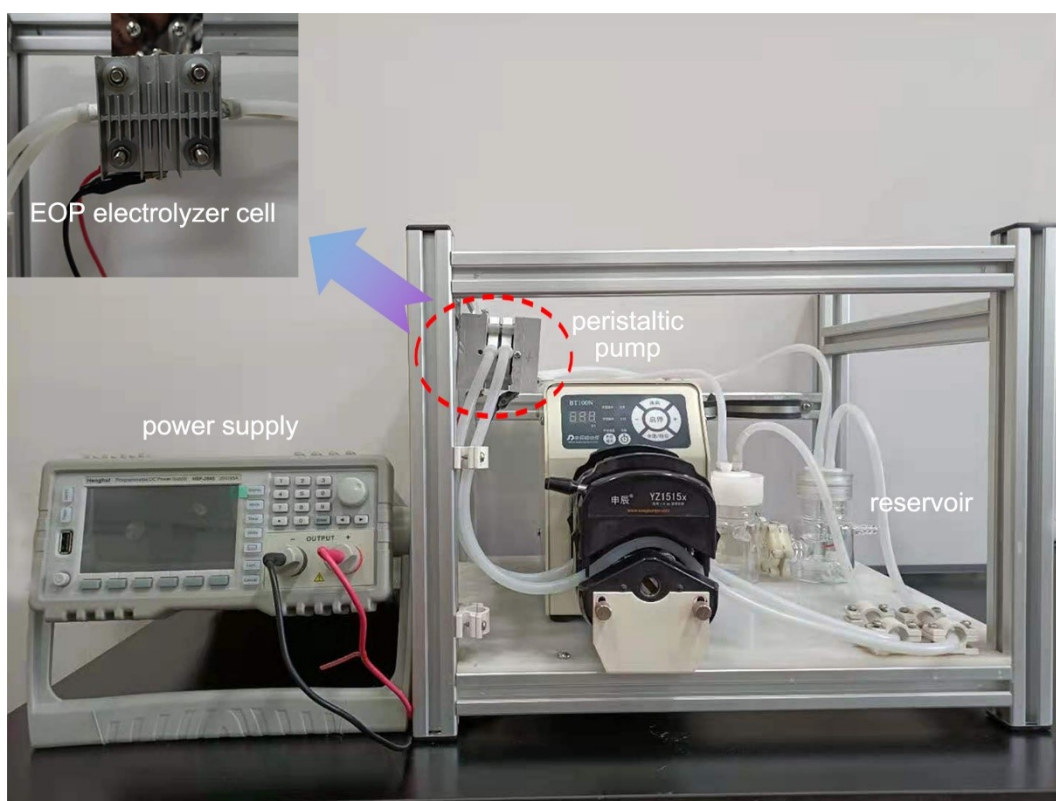

**Fig. S36.** Photograph of the electrochemical degradation system.
